# Supplementary material for: Bio-inspired facile strategy for programmable osmosis-driven shape-morphing elastomer composite structures
Source: Royal Society of Chemistry journal article supplement (doi:10.1039/d3mh01731a), 2024-01-01
Supplement: d3mh01731a1.pdf [file d3mh01731a1.pdf]

## Supporting Information

### **Bio-inspired Facile Strategy for Programmable Osmosis-driven Shape-morphing Elastomer Composite Structures**

*Yuanhang Yang, Yueying Wang, Marcus Lin, Mingchao Liu\*, and Changjin Huang\**

Y. Yang, Y. Wang, M. Lin, M. Liu, C. Huang

School of Mechanical and Aerospace Engineering, Nanyang Technological University,  
Singapore 639798, Singapore

Email: [mingchao.liu@ntu.edu.sg](mailto:mingchao.liu@ntu.edu.sg); [cjhuang@ntu.edu.sg](mailto:cjhuang@ntu.edu.sg)

M. Liu

Department of Mechanical Engineering, University of Birmingham, Birmingham B15  
2TT, UK

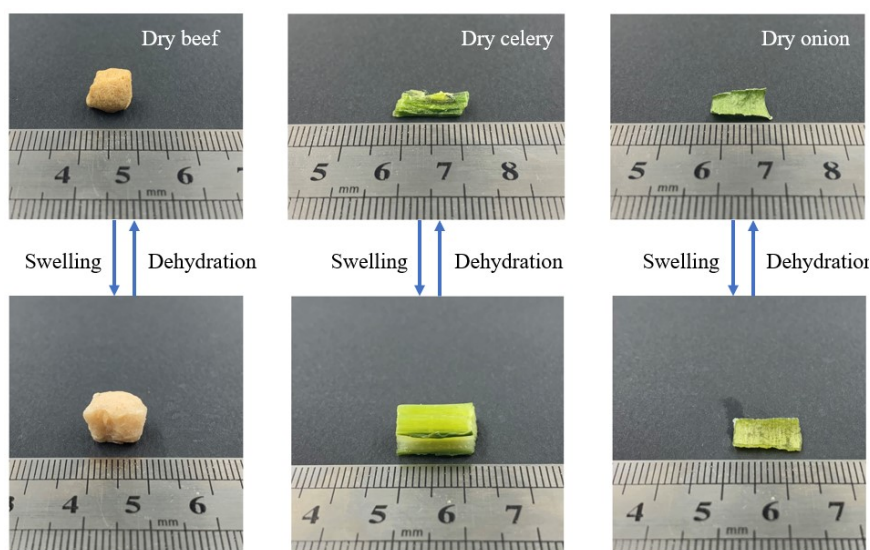

**Figure S1.** Shape changes of meat and plant tissues after swelling in water (Top row) and dehydration in air (Bottom row).

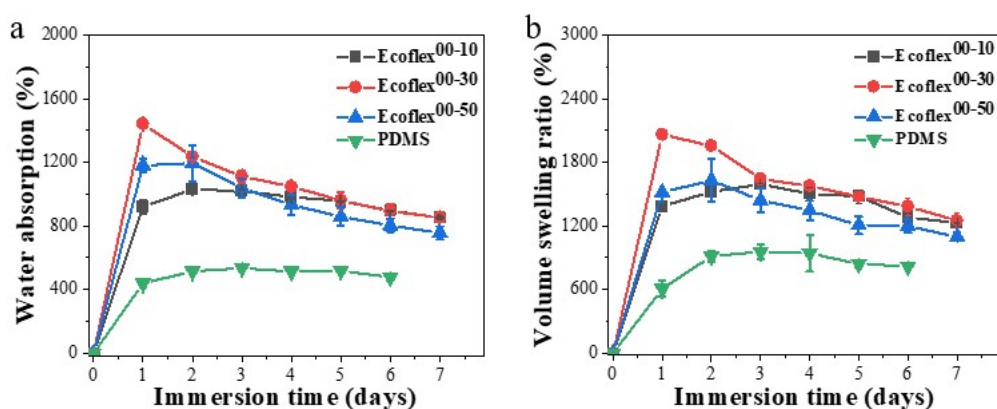

**Figure S2.** Swelling responses of Ecoflex<sup>00-10</sup>/NaCl composites using different water-unswellable polymers as the matrix. (a) Water absorption and (b) volume swelling ratio of different polymer composites with 50 wt.% NaCl in 300 mL of DI water under 60 °C. The base-to-cure agent ratio of PDMS is 30:1.

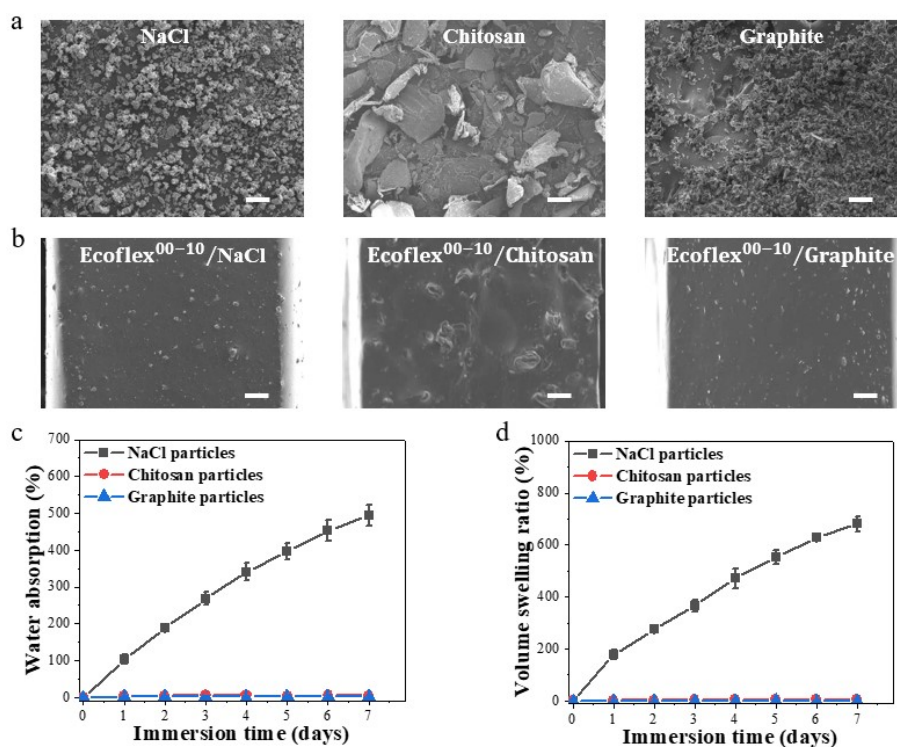

**Figure S3.** Swelling responses of Ecoflex<sup>00-10</sup>-based polymer composites mixed with different particles. (a) Representative scanning electron microscopy (SEM) images of NaCl, chitosan, and graphite particles. (b) Representative cross-sectional morphologies of the Ecoflex<sup>00-10</sup>/NaCl, Ecoflex<sup>00-10</sup>/chitosan, and Ecoflex<sup>00-10</sup>/graphite polymer composites. Scale bars: 100  $\mu$ m. (c-d) Temporal evolution of the water absorption and volume swelling ratio of the polymer composites with 10 wt.% of different particles in 1 L of DI water under 60 °C.

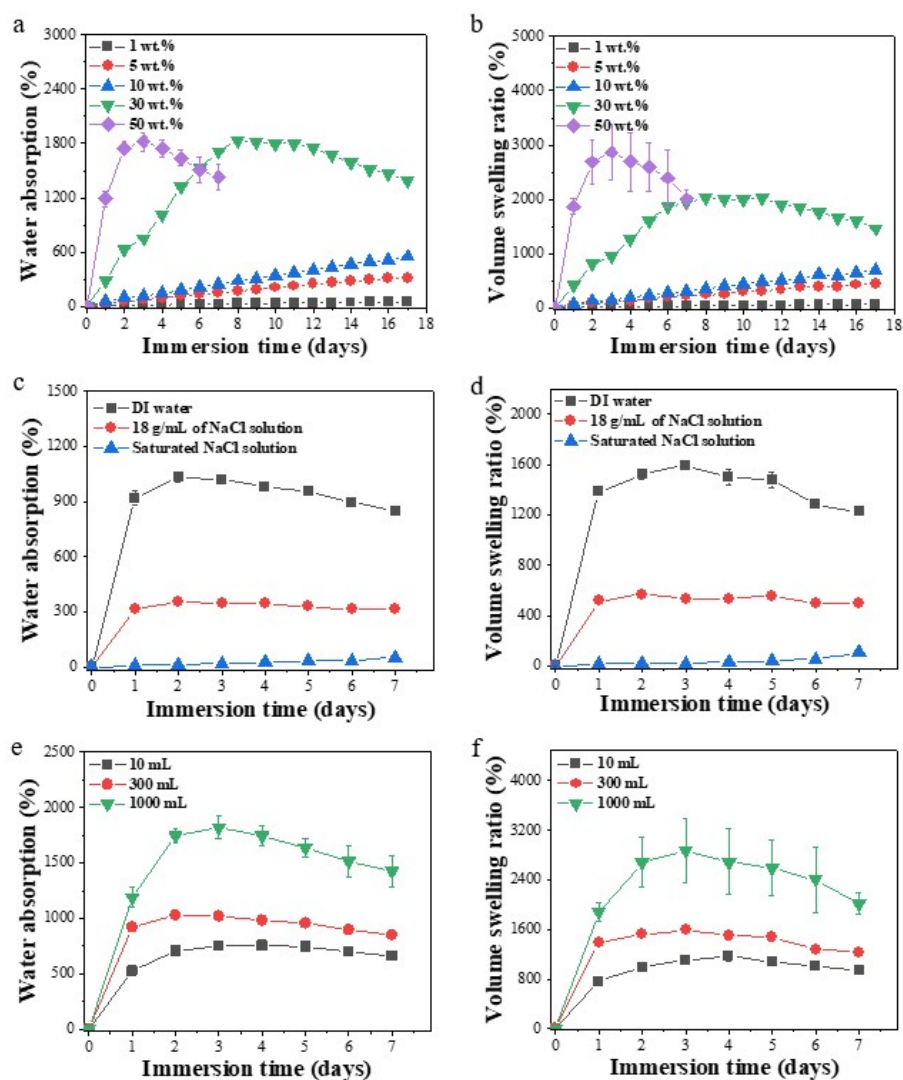

**Figure S4.** Swelling responses of the Ecoflex<sup>00-10</sup>/NaCl polymer composites under various soaking conditions. (a-b) The water absorption and volume swelling ratio of the polymer composites with different NaCl concentrations in 1 L of DI water under 60 °C. (c-d) The water absorption and volume swelling ratio of the polymer composite with 50 wt.% of NaCl in 300 mL of different solutions under 60 °C. (e-f) The water absorption and volume swelling ratio of the polymer composite with 50 wt.% of NaCl in different amounts of DI water under 60 °C.

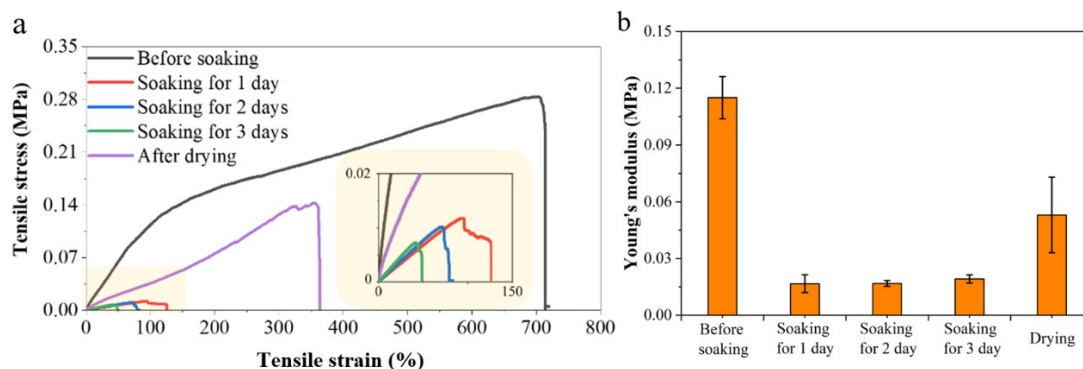

**Figure S5.** Characterization of the mechanical properties of the Ecoflex<sup>00-10</sup>/NaCl polymer composite. (a) Representative stress-strain curves of the sample at different swelling states. (b) Young's modulus of the sample after different treatments.

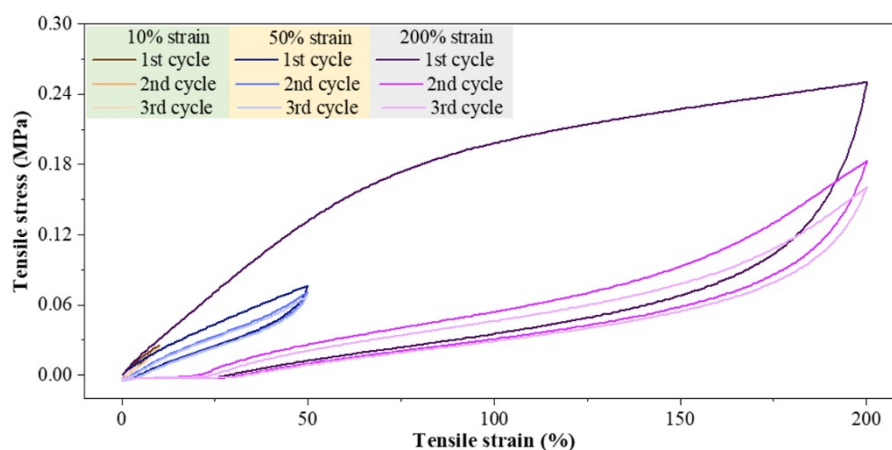

**Figure S6.** Stress-strain curves of the Ecoflex<sup>00-10</sup>/NaCl polymer composite with 50 wt.% NaCl during the first three loading-unloading cycles under maximum 10%, 50% and 200% tensile strains.

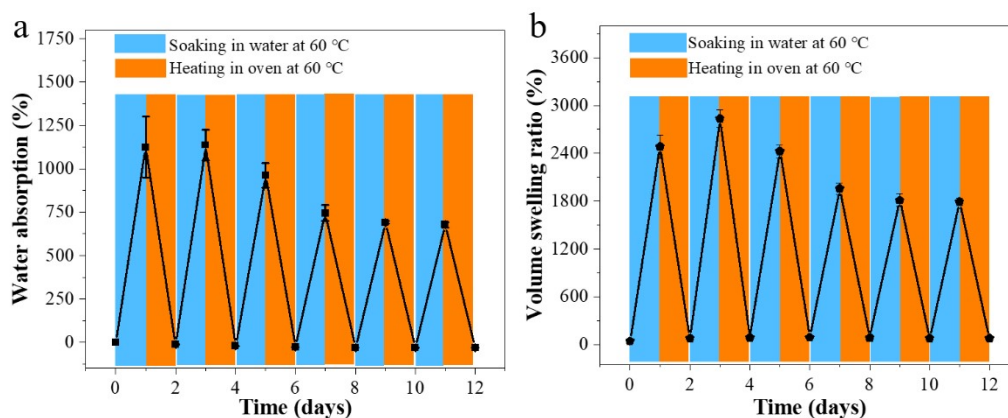

**Figure S7.** Characterization of the swelling repeatability of Ecoflex<sup>00-10</sup>/NaCl polymer composite with 50 wt.% NaCl under cyclic soaking-drying conditions. (a) Water absorption and (b) volume swelling ratio during multiple immersion and drying cycles.

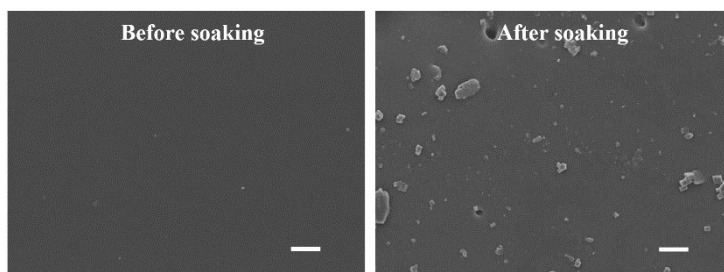

**Figure S8.** Representative SEM images of the Ecoflex<sup>00-10</sup>/NaCl polymer composite surface morphologies before and after soaking in DI water. The swelled sample was dried in oven before imaging. Scale bars: 10  $\mu$ m.

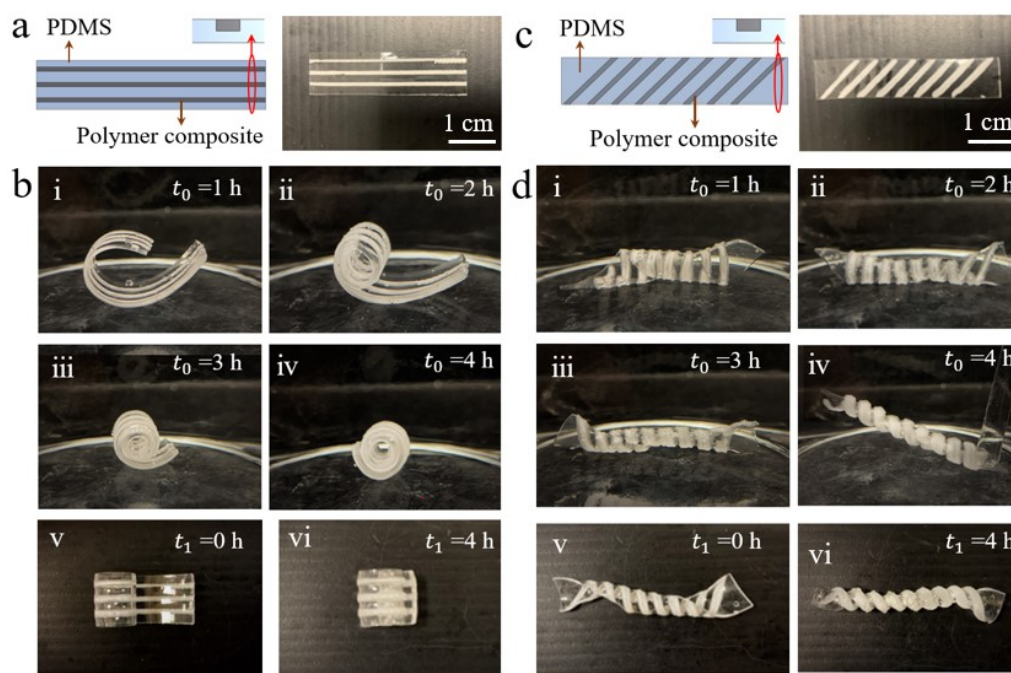

**Figure S9.** Swelling-induced shape morphing of PDMS structures with semi-embedded polymer composite strips. (a) Schematic illustration and an image of a rectangular PDMS strip with polymer composite strips semi-embedded in parallel to the PDMS strip. (b) Shape morphing of the sample in (a) at different stages (Panels i-iv: progressive shape morphing process as immersion extends from one to four hours; Panels v-vi: after drying). (c) Schematic illustration and an image of a rectangular PDMS strip with polymer composite strips semi-embedded in diagonal to the PDMS strip. (d) Shape morphing of the sample in (c) at different stages (Panels i-iv: progressive shape morphing process as immersion extends from one to four hours; Panels v-vi: after drying).

Panels iv-v: morphed shape partially recovers with drying; Panels v-vi: re-morphing after putting the sample back in water). (c) Schematic illustration and an image of a rectangular PDMS strip consisting of polymer composite strips semi-embedded in PDMS in 45°. (d) Shape morphing of the sample in (c) at different stages (Panels i-iv: progressive shape morphing process as immersion extends from one to four hours; Panels iv-v: morphed shape partially recovers with drying; Panels v-vi: re-morphing after putting the sample back in water).

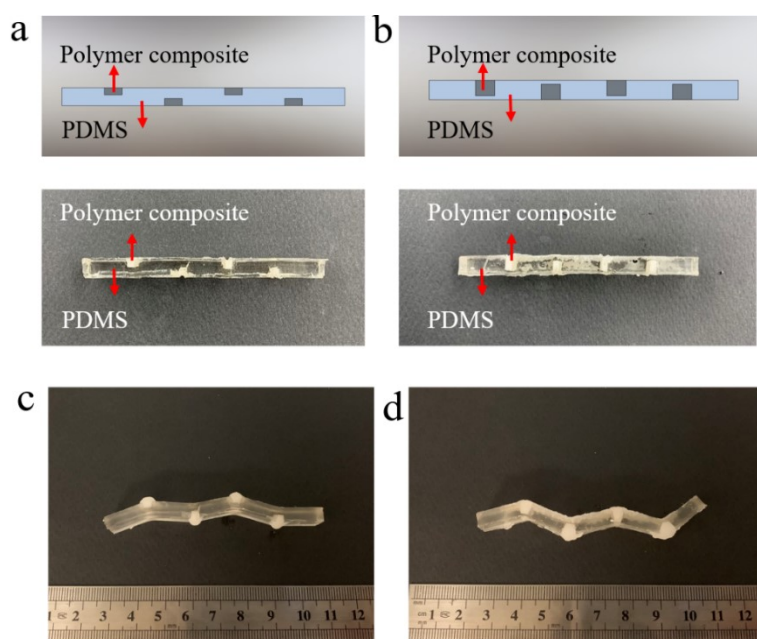

**Figure S10.** Swelling-induced zigzag-shaped bending of PDMS strips. (a-b) Schematic illustration and the physical models of the PDMS strips with semi-embedded Ecoflex<sup>00-10</sup>/NaCl polymer composite strips of different thicknesses. (c-d) The fully swelled configurations of the samples in (a) and (b), respectively.

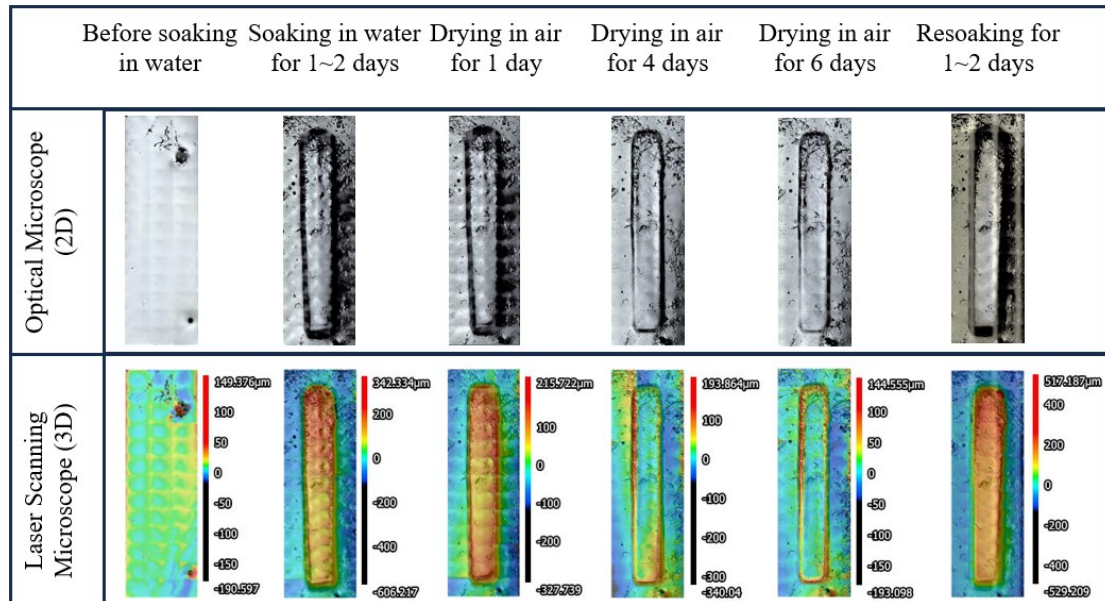

**Figure S11.** The optical microscopy and laser scanning microscopy images of Braille surface before and after soaking in water, drying in ambient air, and resoaking in water.

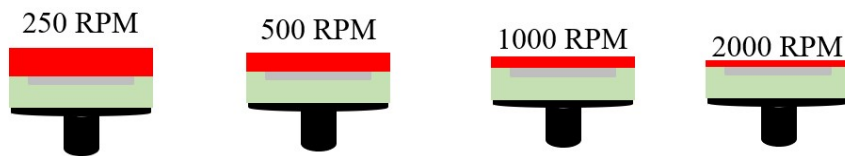

**Figure S12.** Schematic illustration of the control over the thickness of the liquid PDMS layer on top of PDMS samples with semi-embedded Ecoflex<sup>00-10</sup>/NaCl polymer composite by adopting different spin-coating speeds.

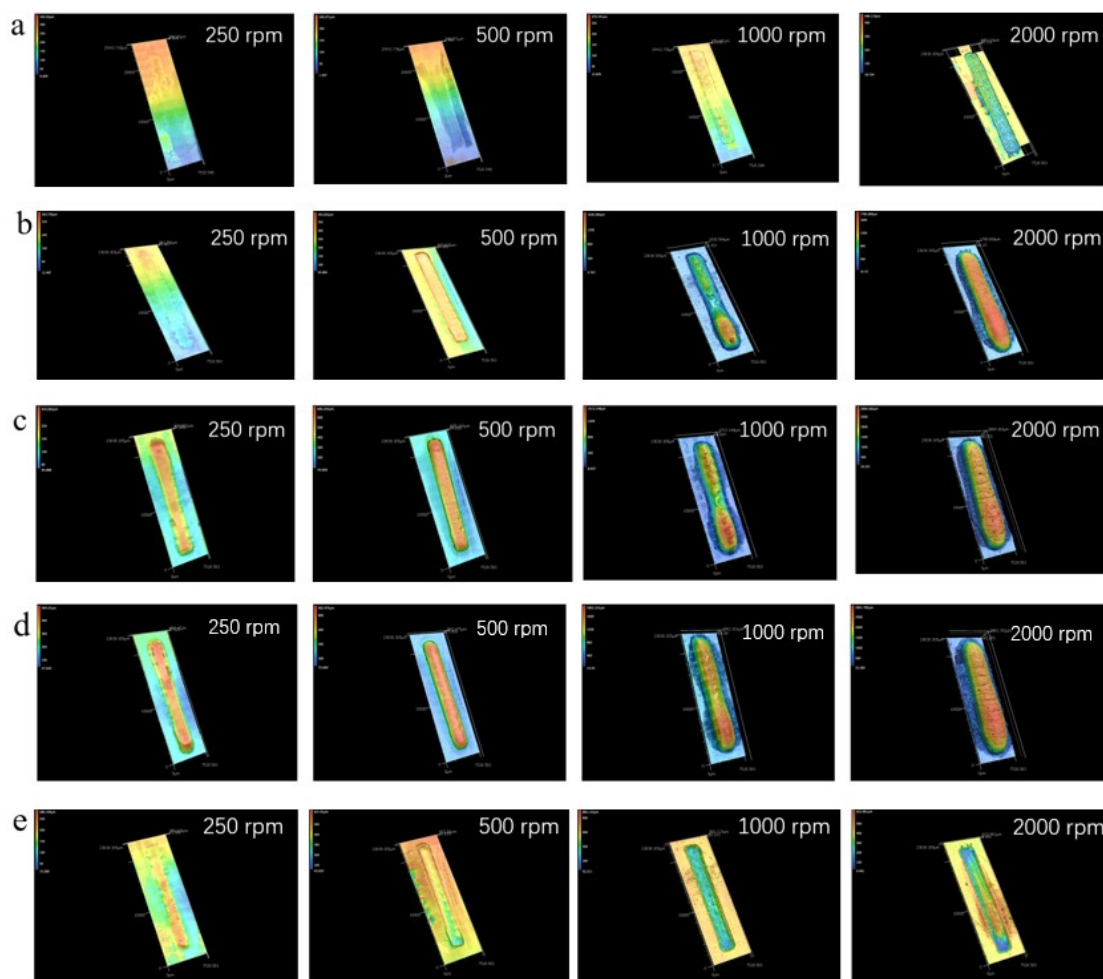

**Figure S13.** Surface morphologies of the sample that covered with PDMS of different thicknesses under different swelling states. (a) Before soaking in water. (b) After soaking in water for 1 day. (c) After soaking in water for 2 days. (d) After soaking in water for 3 days. (e) After drying.

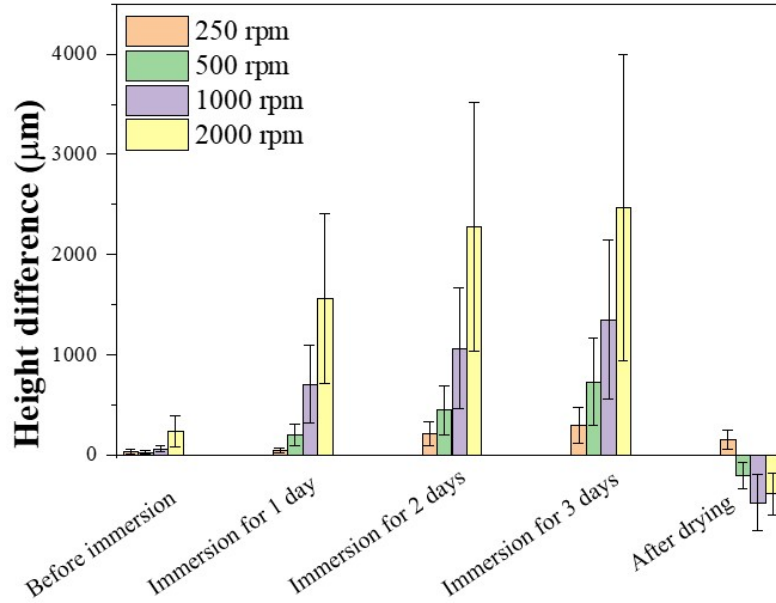

**Figure S14.** Calculated height change based on the surface morphologies in Figure S13.

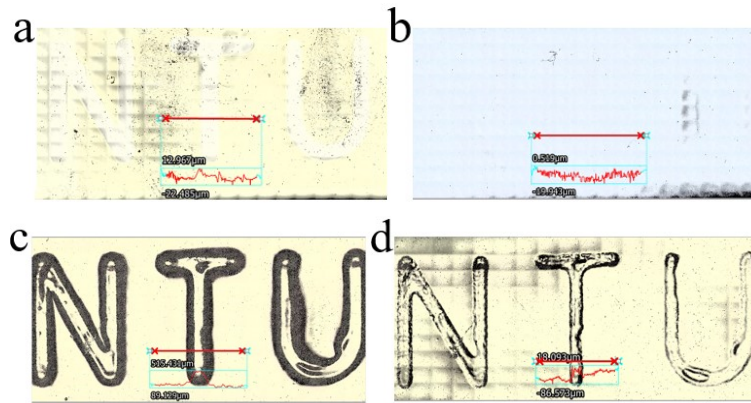

**Figure S15.** Optical images of the PDMS samples embedded with Ecoflex<sup>00-10</sup>/NaCl polymer composite after different treatments. (a) Braille “NTU” with a visual difference before soaking. (b) Braille “NTU” without a visual and tactile difference before soaking. (c) Braille “NTU” with a clear visual and tactile regulation after soaking. (d) Decrease of a visual and tactile regulation after drying.
